# Supplementary material for: An Analysis of JADE2 in Non-Small Cell Lung Cancer (NSCLC)
Source: MDPI journal article supplement (doi:10.3390/biomedicines11092576), 2023-09-19
Supplement: s1 [file s1]

**Supplementary Table S2. Mutated genes associated with significantly altered JADE2 expression in LUSC as determined using MuTarget.**

| Mutation of | Mean expression (mutant) | Mean expression (wild) | Number of mutant | Number of wild | FC (mutant/wild) | Direction | p-value  |
|-------------|--------------------------|------------------------|------------------|----------------|------------------|-----------|----------|
| TEP1        | 1184.76                  | 2038.64                | 17               | 471            | 1.72             | down      | 6.55E-04 |
| ZNF800      | 4156.3                   | 1963.97                | 10               | 478            | 2.12             | up        | 6.74E-04 |
| HECW1       | 1248.88                  | 2062.23                | 32               | 456            | 1.64             | down      | 8.54E-04 |
| AMER1       | 1007.05                  | 2049.48                | 19               | 469            | 2.04             | down      | 9.90E-04 |
| MYOM3       | 956.13                   | 2042.28                | 15               | 473            | 2.13             | down      | 1.67E-03 |
| TYK2        | 852.64                   | 2035.56                | 11               | 477            | 2.38             | down      | 1.95E-03 |
| POLA1       | 914.31                   | 2038.85                | 13               | 475            | 2.22             | down      | 2.40E-03 |
| SMARCA4     | 1098.35                  | 2041.76                | 17               | 471            | 1.85             | down      | 2.57E-03 |
| CWF19L2     | 993.4                    | 2041.1                 | 15               | 473            | 2.04             | down      | 2.90E-03 |
| DOPEY2      | 3772                     | 1964.45                | 12               | 476            | 1.92             | up        | 3.55E-03 |
| IGSF11      | 3029.56                  | 1974.3                 | 16               | 472            | 1.53             | up        | 3.92E-03 |
| KCTD16      | 3690.53                  | 1955.57                | 15               | 473            | 1.89             | up        | 4.42E-03 |
| AGMO        | 1070.75                  | 2040.7                 | 16               | 472            | 1.92             | down      | 6.63E-03 |
| PADI1       | 1146                     | 2028.8                 | 11               | 477            | 1.79             | down      | 6.76E-03 |
| MYH11       | 1176.89                  | 2042.6                 | 19               | 469            | 1.72             | down      | 6.76E-03 |
| CHD3        | 961.15                   | 2037.57                | 13               | 475            | 2.13             | down      | 7.01E-03 |
| DNAH3       | 1342.56                  | 2073.29                | 43               | 445            | 1.54             | down      | 7.60E-03 |
| OR6K3       | 3266.78                  | 1960.72                | 18               | 470            | 1.67             | up        | 8.44E-03 |
| TECRL       | 1176.47                  | 2038.94                | 17               | 471            | 1.72             | down      | 8.73E-03 |
| KIF17       | 912.4                    | 2031.84                | 10               | 478            | 2.22             | down      | 9.26E-03 |
| PRSS16      | 3240.5                   | 1983.13                | 10               | 478            | 1.63             | up        | 9.48E-03 |
| EPHA3       | 1397.91                  | 2056.1                 | 35               | 453            | 1.47             | down      | 9.98E-03 |
