# Supplementary material for: An Analysis of JADE2 in Non-Small Cell Lung Cancer (NSCLC)
Source: MDPI journal article supplement (doi:10.3390/biomedicines11092576), 2023-09-19
Supplement: s1 [file s1]

Supplementary Table S3: TIMER2 analysis of Immune Cell infiltrations associated with JADE2 mRNA expression in LUAD

| Infiltrates                                | rho      | p               | adj.p    |
|--------------------------------------------|----------|-----------------|----------|
| <b>B Cells</b>                             |          |                 |          |
| B cell memory_CIBERSORT                    | 0.166845 | <b>0.000198</b> | 0.001307 |
| B cell memory_CIBERSORT-ABS                | 0.2148   | <b>1.48E-06</b> | 1.71E-05 |
| B cell memory_XCELL                        | -0.06192 | 0.169884        | 0.297172 |
| B cell naive_CIBERSORT                     | -0.1131  | <b>0.011974</b> | 0.039046 |
| B cell naive_CIBERSORT-ABS                 | -0.03625 | 0.421926        | 0.565079 |
| B cell naive_XCELL                         | 0.099242 | <b>0.027569</b> | 0.072233 |
| B cell plasma_CIBERSORT                    | -0.21243 | <b>1.94E-06</b> | 2.20E-05 |
| B cell plasma_CIBERSORT-ABS                | -0.05433 | 0.228538        | 0.369603 |
| B cell plasma_XCELL                        | -0.21541 | <b>1.38E-06</b> | 1.63E-05 |
| B cell_EPIC                                | 0.094217 | <b>0.036501</b> | 0.09202  |
| B cell_MCPCOUNTER                          | 0.150709 | <b>0.000788</b> | 0.004111 |
| B cell_QUANTISEQ                           | 0.160785 | <b>0.000338</b> | 0.002112 |
| B cell_TIMER                               | 0.106972 | <b>0.017503</b> | 0.051555 |
| B cell_XCELL                               | 0.123861 | <b>0.005891</b> | 0.022513 |
| Class-switched memory B cell_XCELL         | 0.259172 | <b>5.22E-09</b> | 1.04E-07 |
| <b>CD8+ T Cells</b>                        |          |                 |          |
| T cell CD8+ central memory_XCELL           | 0.090543 | <b>0.044495</b> | 0.106653 |
| T cell CD8+ effector memory_XCELL          | 0.135344 | <b>0.002601</b> | 0.009544 |
| T cell CD8+ naive_XCELL                    | -0.18011 | <b>5.78E-05</b> | 0.000309 |
| T cell CD8+_CIBERSORT                      | -0.03111 | 0.490752        | 0.633229 |
| T cell CD8+_CIBERSORT-ABS                  | 0.208726 | <b>2.95E-06</b> | 2.13E-05 |
| T cell CD8+_EPIC                           | 0.081854 | 0.069388        | 0.153344 |
| T cell CD8+_MCPCOUNTER                     | 0.070287 | 0.119092        | 0.236999 |
| T cell CD8+_QUANTISEQ                      | 0.149393 | <b>0.000877</b> | 0.003473 |
| T cell CD8+_TIMER                          | 0.246549 | <b>2.92E-08</b> | 3.65E-07 |
| T cell CD8+_XCELL                          | 0.134134 | <b>0.002843</b> | 0.010065 |
| <b>CD4+ T Cells</b>                        |          |                 |          |
| T cell CD4+ (non-regulatory)_QUANTISEQ     | 0.090543 | <b>0.044495</b> | 0.106653 |
| T cell CD4+ (non-regulatory)_XCELL         | 0.135344 | <b>0.002601</b> | 0.009544 |
| T cell CD4+ central memory_XCELL           | -0.18011 | <b>5.78E-05</b> | 0.000309 |
| T cell CD4+ effector memory_XCELL          | -0.03111 | 0.490752        | 0.633229 |
| T cell CD4+ memory activated_CIBERSORT     | 0.208726 | <b>2.95E-06</b> | 2.13E-05 |
| T cell CD4+ memory activated_CIBERSORT-ABS | 0.081854 | 0.069388        | 0.153344 |
| T cell CD4+ memory resting_CIBERSORT       | 0.070287 | 0.119092        | 0.236999 |
| T cell CD4+ memory resting_CIBERSORT-ABS   | 0.149393 | <b>0.000877</b> | 0.003473 |
| T cell CD4+ memory_XCELL                   | 0.246549 | <b>2.92E-08</b> | 3.65E-07 |
| T cell CD4+ naïve_CIBERSORT                | 0.134134 | <b>0.002843</b> | 0.010065 |
| T cell CD4+ naïve_CIBERSORT-ABS            | 0.090543 | <b>0.044495</b> | 0.106653 |
| T cell CD4+ naïve_XCELL                    | 0.135344 | <b>0.002601</b> | 0.009544 |
| T cell CD4+ Th1_XCELL                      | -0.18011 | <b>5.78E-05</b> | 0.000309 |

|                                                |          |                 |          |
|------------------------------------------------|----------|-----------------|----------|
| T cell CD4+ Th2_XCELL                          | -0.03111 | 0.490752        | 0.633229 |
| T cell CD4+_EPIC                               | 0.208726 | <b>2.95E-06</b> | 2.13E-05 |
| T cell CD4+_TIMER                              | 0.081854 | 0.069388        | 0.153344 |
| <b>Macrophages</b>                             |          |                 |          |
| Macrophage M0_CIBERSORT                        | -0.10907 | <b>0.015398</b> | 0.036611 |
| Macrophage M0_CIBERSORT-ABS                    | -0.02392 | 0.596202        | 0.679621 |
| Macrophage M1_CIBERSORT                        | -0.02472 | 0.584012        | 0.667443 |
| Macrophage M1_CIBERSORT-ABS                    | 0.155166 | <b>0.000545</b> | 0.001913 |
| Macrophage M1_QUANTISEQ                        | 0.349864 | <b>1.22E-15</b> | 4.29E-14 |
| Macrophage M1_XCELL                            | 0.039693 | 0.379167        | 0.489247 |
| Macrophage M2_CIBERSORT                        | 0.109031 | <b>0.015437</b> | 0.036611 |
| Macrophage M2_CIBERSORT-ABS                    | 0.382891 | <b>1.16E-18</b> | 6.34E-17 |
| Macrophage M2_QUANTISEQ                        | 0.289641 | <b>5.54E-11</b> | 7.38E-10 |
| Macrophage M2_TIDE                             | -0.20586 | <b>4.05E-06</b> | 2.15E-05 |
| Macrophage M2_XCELL                            | 0.087414 | 0.052417        | 0.10414  |
| Macrophage_EPIC                                | 0.13754  | <b>0.002208</b> | 0.006495 |
| Macrophage_TIMER                               | 0.085324 | 0.058339        | 0.111893 |
| Macrophage_XCELL                               | 0.096552 | <b>0.032084</b> | 0.068023 |
| Macrophage/Monocyte_MCPCOUNTER                 | 0.175985 | <b>8.56E-05</b> | 0.000347 |
| <b>Neutrophils</b>                             |          |                 |          |
| Neutrophil_CIBERSORT                           | 0.005188 | 0.90852         | 0.948193 |
| Neutrophil_CIBERSORT-ABS                       | 0.052623 | 0.243505        | 0.369816 |
| Neutrophil_MCPCOUNTER                          | 0.330682 | <b>4.82E-14</b> | 7.68E-13 |
| Neutrophil_QUANTISEQ                           | 0.227347 | <b>3.36E-07</b> | 2.68E-06 |
| Neutrophil_TIMER                               | 0.248544 | <b>2.24E-08</b> | 1.98E-07 |
| Neutrophil_XCELL                               | -0.09396 | <b>0.037008</b> | 0.081896 |
| <b>Dendritic Cells</b>                         |          |                 |          |
| Myeloid dendritic cell activated_CIBERSORT     | 0.091392 | <b>0.042527</b> | 0.116728 |
| Myeloid dendritic cell activated_CIBERSORT-ABS | 0.139556 | <b>0.001896</b> | 0.008116 |
| Myeloid dendritic cell activated_XCELL         | 0.235795 | <b>1.18E-07</b> | 1.23E-06 |
| Myeloid dendritic cell resting_CIBERSORT       | 0.127863 | <b>0.004462</b> | 0.017242 |
| Myeloid dendritic cell resting_CIBERSORT-ABS   | 0.185883 | <b>3.28E-05</b> | 0.000211 |
| Myeloid dendritic cell_MCPCOUNTER              | 0.298088 | <b>1.42E-11</b> | 2.82E-10 |
| Myeloid dendritic cell_QUANTISEQ               | -0.11106 | <b>0.013617</b> | 0.045928 |
| Myeloid dendritic cell_TIMER                   | 0.326905 | <b>9.65E-14</b> | 2.96E-12 |
| Myeloid dendritic cell_XCELL                   | 0.305082 | <b>4.44E-12</b> | 9.30E-11 |
| Plasmacytoid dendritic cell_XCELL              | -0.10327 | <b>0.021833</b> | 0.068422 |
