# Supplementary material for: An Analysis of JADE2 in Non-Small Cell Lung Cancer (NSCLC)
Source: MDPI journal article supplement (doi:10.3390/biomedicines11092576), 2023-09-19
Supplement: s1 [file s1]

**Supplementary Table S1. Mutated genes associated with significantly altered JADE2 expression in LUAD as determined using MuTarget.**

| Mutation of | Mean expression<br>(mutant) | Mean expression<br>(wild) | Number of<br>mutant | Number of<br>wild | FC<br>(mutant/wild) | Direction | p-value  |
|-------------|-----------------------------|---------------------------|---------------------|-------------------|---------------------|-----------|----------|
| SLC22A25    | 853.08                      | 1674.28                   | 12                  | 496               | 1.96                | down      | 3.60E-05 |
| KCNT1       | 934.19                      | 1678.32                   | 16                  | 492               | 1.79                | down      | 4.06E-05 |
| HECW2       | 1047.79                     | 1678.47                   | 19                  | 489               | 1.61                | down      | 1.21E-04 |
| KRT34       | 893.5                       | 1673.31                   | 12                  | 496               | 1.89                | down      | 2.11E-04 |
| CNTN4       | 1032.11                     | 1677.76                   | 18                  | 490               | 1.61                | down      | 2.33E-04 |
| SYCP2       | 1092.18                     | 1674.37                   | 17                  | 491               | 1.54                | down      | 5.07E-04 |
| TOX2        | 1010.87                     | 1674.48                   | 15                  | 493               | 1.67                | down      | 5.41E-04 |
| ADGRB1      | 1095.59                     | 1674.25                   | 17                  | 491               | 1.54                | down      | 7.67E-04 |
| PIK3AP1     | 1123.22                     | 1674.42                   | 18                  | 490               | 1.49                | down      | 1.01E-03 |
| CAND1       | 1004.27                     | 1669.29                   | 11                  | 497               | 1.67                | down      | 1.37E-03 |
| CADPS       | 1156.1                      | 1676.39                   | 21                  | 487               | 1.45                | down      | 1.46E-03 |
| RNF133      | 979.91                      | 1669.82                   | 11                  | 497               | 1.69                | down      | 1.56E-03 |
| DSG2        | 1015.36                     | 1669.04                   | 11                  | 497               | 1.64                | down      | 1.83E-03 |
| NCAM2       | 1165.13                     | 1678.11                   | 23                  | 485               | 1.45                | down      | 1.86E-03 |
| MAST1       | 995.27                      | 1669.48                   | 11                  | 497               | 1.67                | down      | 1.95E-03 |
| ATP12A      | 1107.53                     | 1671.54                   | 15                  | 493               | 1.52                | down      | 2.22E-03 |
| UBTFL1      | 1095.83                     | 1668.41                   | 12                  | 496               | 1.52                | down      | 2.49E-03 |
| EYA4        | 1158.35                     | 1675.24                   | 20                  | 488               | 1.45                | down      | 2.56E-03 |
| TCF20       | 1147.27                     | 1670.33                   | 15                  | 493               | 1.45                | down      | 3.13E-03 |
| PABPC5      | 1106.36                     | 1670.43                   | 14                  | 494               | 1.52                | down      | 3.23E-03 |
| ATOH1       | 1149.67                     | 1670.26                   | 15                  | 493               | 1.45                | down      | 3.31E-03 |
| OR4D5       | 1074                        | 1668.94                   | 12                  | 496               | 1.56                | down      | 3.43E-03 |
| TCERG1L     | 1093.46                     | 1669.63                   | 13                  | 495               | 1.54                | down      | 3.44E-03 |
| PRAMEF11    | 1078.31                     | 1670.03                   | 13                  | 495               | 1.54                | down      | 3.54E-03 |
| RREB1       | 1115.21                     | 1670.18                   | 14                  | 494               | 1.49                | down      | 3.58E-03 |

|           |         |         |    |     |      |      |          |
|-----------|---------|---------|----|-----|------|------|----------|
| ZNF578    | 1156.25 | 1671.1  | 16 | 492 | 1.45 | down | 3.61E-03 |
| ADCYAP1R1 | 1078.75 | 1668.82 | 12 | 496 | 1.54 | down | 3.65E-03 |
| TMTC2     | 1070.08 | 1669.03 | 12 | 496 | 1.56 | down | 3.83E-03 |
| ATP8B3    | 1077.75 | 1668.85 | 12 | 496 | 1.54 | down | 3.98E-03 |
| REG3G     | 1130.53 | 1673.04 | 17 | 491 | 1.47 | down | 3.99E-03 |
| ZNF267    | 1149.93 | 1669.2  | 14 | 494 | 1.45 | down | 4.06E-03 |
| TCF4      | 1147.8  | 1670.31 | 15 | 493 | 1.45 | down | 4.09E-03 |
| NUTM1     | 1139.87 | 1670.56 | 15 | 493 | 1.47 | down | 4.13E-03 |
| KRT6B     | 1116.4  | 1671.27 | 15 | 493 | 1.49 | down | 4.24E-03 |
| SLC6A18   | 1137.59 | 1672.8  | 17 | 491 | 1.47 | down | 4.29E-03 |
| MAATS1    | 1161.28 | 1673.02 | 18 | 490 | 1.45 | down | 4.31E-03 |
| CACHD1    | 1049.18 | 1668.29 | 11 | 497 | 1.59 | down | 4.54E-03 |
| ATP10A    | 1132.44 | 1671.88 | 16 | 492 | 1.47 | down | 4.74E-03 |
| ITGAV     | 1109    | 1669.22 | 13 | 495 | 1.52 | down | 4.81E-03 |
| ZZEF1     | 1142.56 | 1673.71 | 18 | 490 | 1.47 | down | 5.38E-03 |
| IFI44L    | 1134.43 | 1669.64 | 14 | 494 | 1.47 | down | 5.38E-03 |
| CCDC144A  | 1036.91 | 1668.56 | 11 | 497 | 1.61 | down | 5.46E-03 |
| DCLK1     | 1136.88 | 1671.73 | 16 | 492 | 1.47 | down | 5.46E-03 |
| SLC17A4   | 1118.67 | 1671.2  | 15 | 493 | 1.49 | down | 5.82E-03 |
| MAGEB1    | 1128.07 | 1669.82 | 14 | 494 | 1.47 | down | 6.39E-03 |
| USH1C     | 1115.23 | 1669.06 | 13 | 495 | 1.49 | down | 6.98E-03 |
| KLB       | 1160.07 | 1669.94 | 15 | 493 | 1.45 | down | 7.09E-03 |
| IRX1      | 1141.87 | 1670.49 | 15 | 493 | 1.47 | down | 7.28E-03 |
| MCM10     | 1067.09 | 1667.9  | 11 | 497 | 1.56 | down | 7.46E-03 |
| SCYL2     | 1115.55 | 1666.82 | 11 | 497 | 1.49 | down | 7.74E-03 |
| SFSWAP    | 1120.33 | 1667.82 | 12 | 496 | 1.49 | down | 8.17E-03 |
| PHF20L1   | 1158.13 | 1670    | 15 | 493 | 1.45 | down | 8.36E-03 |
| EIF4G3    | 1126.77 | 1668.76 | 13 | 495 | 1.47 | down | 8.88E-03 |
| REM1      | 1133.92 | 1668.57 | 13 | 495 | 1.47 | down | 8.91E-03 |

|           |         |         |    |     |      |      |          |
|-----------|---------|---------|----|-----|------|------|----------|
| GPC4      | 1107.85 | 1669.25 | 13 | 495 | 1.52 | down | 8.93E-03 |
| HEG1      | 1068    | 1667.88 | 11 | 497 | 1.56 | down | 9.27E-03 |
| PIK3C2G   | 1154.65 | 1672.21 | 17 | 491 | 1.45 | down | 9.77E-03 |
| SPATA31A7 | 1068.55 | 1667.86 | 11 | 497 | 1.56 | down | 9.81E-03 |
| SMC2      | 1147.23 | 1668.22 | 13 | 495 | 1.45 | down | 9.93E-03 |
