# Supplementary material for: An Analysis of JADE2 in Non-Small Cell Lung Cancer (NSCLC)
Source: MDPI journal article supplement (doi:10.3390/biomedicines11092576), 2023-09-19
Supplement: s1 [file s1]

(A) All Histologies

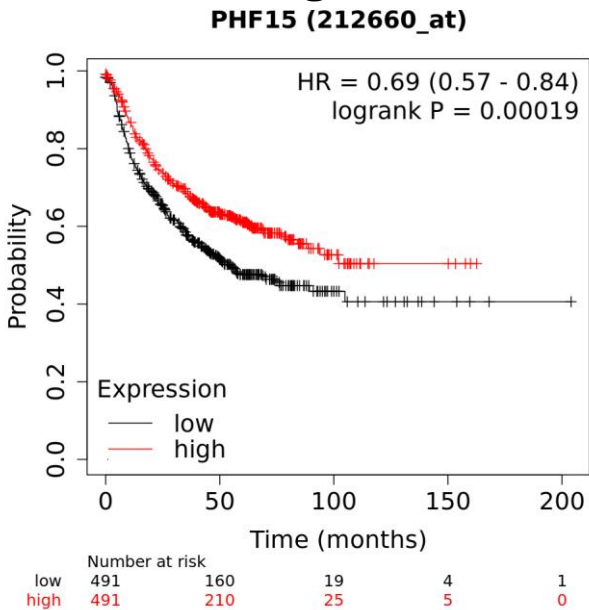

Low expression cohort (months)

13.54

High expression cohort (months)

22.53

(B) LUAD

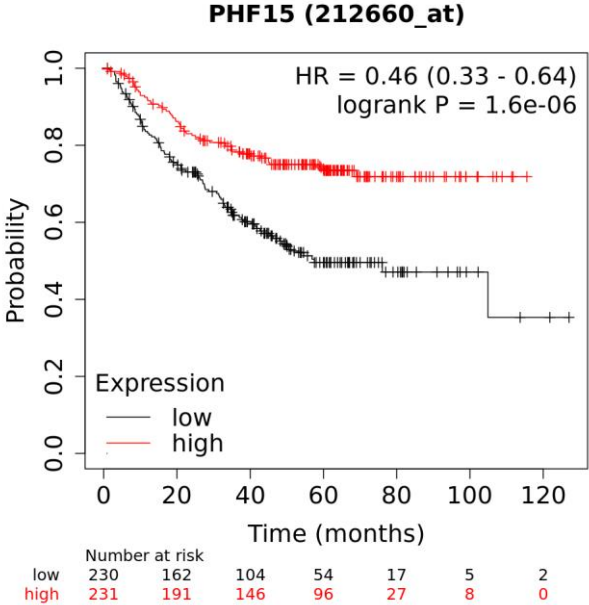

Low expression cohort (months)

20.07

High expression cohort (months)

45.3

(C) LUSC

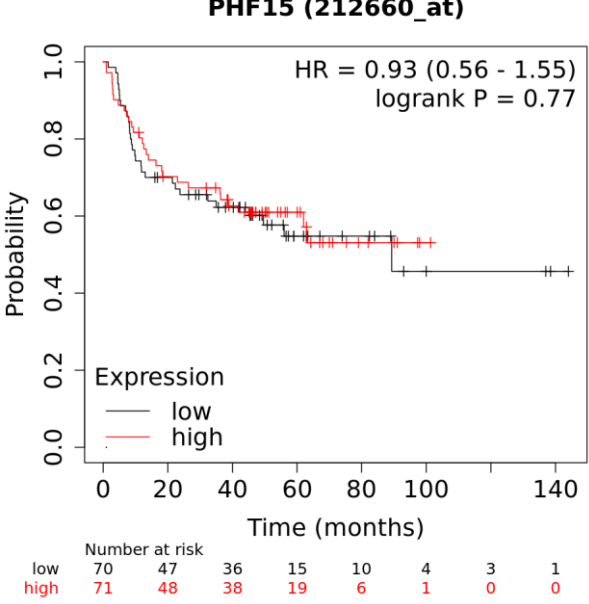

Low expression cohort (months)

10

High expression cohort (months)

14
