# Supplementary material for: An Analysis of JADE2 in Non-Small Cell Lung Cancer (NSCLC)
Source: MDPI journal article supplement (doi:10.3390/biomedicines11092576), 2023-09-19
Supplement: s1 [file s1]

Supplementary Table S4. TIMER2 analysis of Immune Cell infiltrations associated with JADE2 expression in LUSC

| Infiltrates                                | rho      | p               | adj.p    |
|--------------------------------------------|----------|-----------------|----------|
| <b>B Cells</b>                             |          |                 |          |
| B cell memory_CIBERSORT                    | 0.02508  | 0.584787        | 0.716066 |
| B cell memory_CIBERSORT-ABS                | 0.039844 | 0.38525         | 0.538811 |
| B cell memory_XCELL                        | 0.021477 | 0.639861        | 0.759793 |
| B cell naive_CIBERSORT                     | 0.054875 | 0.231601        | 0.371552 |
| B cell naive_CIBERSORT-ABS                 | 0.101691 | <b>0.026358</b> | 0.070289 |
| B cell naive_XCELL                         | 0.176781 | <b>0.000104</b> | 0.000742 |
| B cell plasma_CIBERSORT                    | -0.20345 | <b>7.51E-06</b> | 7.27E-05 |
| B cell plasma_CIBERSORT-ABS                | -0.09262 | <b>0.04319</b>  | 0.106205 |
| B cell plasma_XCELL                        | -0.08961 | <b>0.050463</b> | 0.120149 |
| B cell_EPIC                                | 0.045308 | 0.32342         | 0.465353 |
| B cell_MCPCOUNTER                          | 0.032105 | 0.484219        | 0.61947  |
| B cell_QUANTISEQ                           | 0.153794 | <b>0.000751</b> | 0.004024 |
| B cell_TIMER                               | -0.0225  | 0.624005        | 0.750467 |
| B cell_XCELL                               | 0.125384 | <b>0.006105</b> | 0.023185 |
| Class-switched memory B cell_XCELL         | 0.188575 | <b>3.40E-05</b> | 0.000279 |
| <b>CD8+ T Cells</b>                        |          |                 |          |
| T cell CD8+ central memory_XCELL           | 0.048659 | 0.288885        | 0.431171 |
| T cell CD8+ effector memory_XCELL          | 0.131983 | <b>0.003882</b> | 0.01327  |
| T cell CD8+ naive_XCELL                    | -0.10274 | <b>0.024835</b> | 0.065789 |
| T cell CD8+_CIBERSORT                      | 0.060393 | 0.187926        | 0.321241 |
| T cell CD8+_CIBERSORT-ABS                  | 0.172594 | <b>0.000152</b> | 0.000714 |
| T cell CD8+_EPIC                           | -0.08108 | 0.076897        | 0.167167 |
| T cell CD8+_MCPCOUNTER                     | 0.046617 | 0.309622        | 0.448728 |
| T cell CD8+_QUANTISEQ                      | 0.055691 | 0.224728        | 0.363933 |
| T cell CD8+_TIMER                          | 0.084692 | 0.064579        | 0.145941 |
| T cell CD8+_XCELL                          | 0.051743 | 0.259369        | 0.399028 |
| <b>CD4+ T Cells</b>                        |          |                 |          |
| T cell CD4+ (non-regulatory)_QUANTISEQ     | 0.048659 | 0.288885        | 0.431171 |
| T cell CD4+ (non-regulatory)_XCELL         | 0.131983 | <b>0.003882</b> | 0.01327  |
| T cell CD4+ central memory_XCELL           | -0.10274 | <b>0.024835</b> | 0.065789 |
| T cell CD4+ effector memory_XCELL          | 0.060393 | 0.187926        | 0.321241 |
| T cell CD4+ memory activated_CIBERSORT     | 0.172594 | <b>0.000152</b> | 0.000714 |
| T cell CD4+ memory activated_CIBERSORT-ABS | -0.08108 | 0.076897        | 0.167167 |
| T cell CD4+ memory resting_CIBERSORT       | 0.046617 | 0.309622        | 0.448728 |
| T cell CD4+ memory resting_CIBERSORT-ABS   | 0.055691 | 0.224728        | 0.363933 |
| T cell CD4+ memory_XCELL                   | 0.084692 | 0.064579        | 0.145941 |
| T cell CD4+ naïve_CIBERSORT                | 0.051743 | 0.259369        | 0.399028 |
| T cell CD4+ naïve_CIBERSORT-ABS            | 0.048659 | 0.288885        | 0.431171 |
| T cell CD4+ naïve_XCELL                    | 0.131983 | <b>0.003882</b> | 0.01327  |
| T cell CD4+ Th1_XCELL                      | -0.10274 | 0.024835        | 0.065789 |

|                                                |           |                 |          |
|------------------------------------------------|-----------|-----------------|----------|
| T cell CD4+ Th2_XCELL                          | 0.060393  | 0.187926        | 0.321241 |
| T cell CD4+_EPIC                               | 0.172594  | <b>0.000152</b> | 0.000714 |
| T cell CD4+_TIMER                              | -0.08108  | 0.076897        | 0.167167 |
| <b>Macrophages</b>                             |           |                 |          |
| Macrophage M0_CIBERSORT                        | 0.138445  | <b>0.002443</b> | 0.007012 |
| Macrophage M0_CIBERSORT-ABS                    | 0.231153  | <b>3.32E-07</b> | 2.19E-06 |
| Macrophage M1_CIBERSORT                        | 0.112328  | <b>0.014104</b> | 0.033714 |
| Macrophage M1_CIBERSORT-ABS                    | 0.200352  | <b>1.04E-05</b> | 5.28E-05 |
| Macrophage M1_QUANTISEQ                        | 0.084314  | 0.065783        | 0.125302 |
| Macrophage M1_XCELL                            | 0.125232  | <b>0.006168</b> | 0.015748 |
| Macrophage M2_CIBERSORT                        | -0.05526  | 0.228339        | 0.334971 |
| Macrophage M2_CIBERSORT-ABS                    | 0.123764  | <b>0.006802</b> | 0.017149 |
| Macrophage M2_QUANTISEQ                        | 0.184143  | <b>5.21E-05</b> | 0.000225 |
| Macrophage M2_TIDE                             | -0.1682   | <b>0.000224</b> | 0.000846 |
| Macrophage M2_XCELL                            | -0.04097  | 0.37199         | 0.483104 |
| Macrophage_EPIC                                | 0.125234  | <b>0.006167</b> | 0.015748 |
| Macrophage_TIMER                               | 0.025488  | 0.578691        | 0.665162 |
| Macrophage_XCELL                               | 0.075614  | 0.099052        | 0.176878 |
| Macrophage/Monocyte_MCPCOUNTER                 | 0.196562  | <b>1.53E-05</b> | 7.36E-05 |
| <b>Neutrophils</b>                             |           |                 |          |
| Neutrophil_CIBERSORT                           | -0.17709  | <b>0.000101</b> | 0.000496 |
| Neutrophil_CIBERSORT-ABS                       | -0.14692  | <b>0.001292</b> | 0.00454  |
| Neutrophil_MCPCOUNTER                          | 0.195444  | <b>1.72E-05</b> | 9.77E-05 |
| Neutrophil_QUANTISEQ                           | -0.03395  | 0.459447        | 0.616898 |
| Neutrophil_TIMER                               | 0.040949  | 0.372197        | 0.51718  |
| Neutrophil_XCELL                               | -0.15688  | <b>0.000585</b> | 0.002218 |
| <b>Dendritic Cells</b>                         |           |                 |          |
| Myeloid dendritic cell activated_CIBERSORT     | -0.13947  | <b>0.002265</b> | 0.009489 |
| Myeloid dendritic cell activated_CIBERSORT-ABS | -0.10888  | <b>0.017371</b> | 0.05667  |
| Myeloid dendritic cell activated_XCELL         | 0.168034  | <b>0.000227</b> | 0.001257 |
| Myeloid dendritic cell resting_CIBERSORT       | -0.03695  | 0.420743        | 0.581444 |
| Myeloid dendritic cell resting_CIBERSORT-ABS   | -3.54E-06 | 0.999938        | 0.999938 |
| Myeloid dendritic cell_MCPCOUNTER              | 0.141675  | <b>0.001924</b> | 0.008145 |
| Myeloid dendritic cell_QUANTISEQ               | 0.00617   | 0.893076        | 0.937847 |
| Myeloid dendritic cell_TIMER                   | 0.129216  | <b>0.004705</b> | 0.017962 |
| Myeloid dendritic cell_XCELL                   | 0.026049  | 0.570359        | 0.711607 |
| Plasmacytoid dendritic cell_XCELL              | 0.154546  | <b>0.000707</b> | 0.003562 |
