# Supplementary material for: An Analysis of JADE2 in Non-Small Cell Lung Cancer (NSCLC)
Source: Biomedicines. 2023 Sep 19;11(9):2576. doi: 10.3390/biomedicines11092576 (PMC10526426; doi:10.3390/biomedicines11092576)
Supplement: Supplementary file 1 [file biomedicines-11-02576-s001.zip]

Archive with 13 entries (13 files):
- Supplementary Figure Legends.pdf
- Supplementary Figure S1.pdf
- Supplementary Figure S2.pdf
- Supplementary Figure S3.pdf
- Supplementary Figure S4.pdf
- Supplementary Figure S5.pdf
- Supplementary Figure S6.pdf
- Supplementary Figure S7.pdf
- Supplementary Figure S8.pdf
- Supplementary Table S1 MuTarget LUAD.pdf
- Supplementary Table S2 MuTarget LUSC.pdf
- Supplementary Table S3 TIIL LUAD.pdf
- Supplementary Table S4 TIIL LUSC.pdf
