# Supplementary figures and images for: An Analysis of JADE2 in Non-Small Cell Lung Cancer (NSCLC)
Source: MDPI journal article supplement (doi:10.3390/biomedicines11092576), 2023-09-19

Tumor

Normal

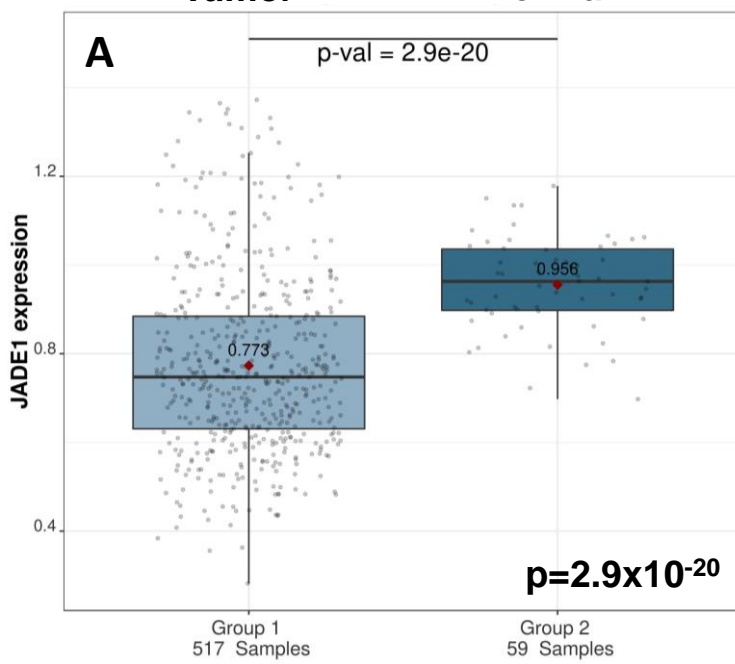

Tumor

Normal

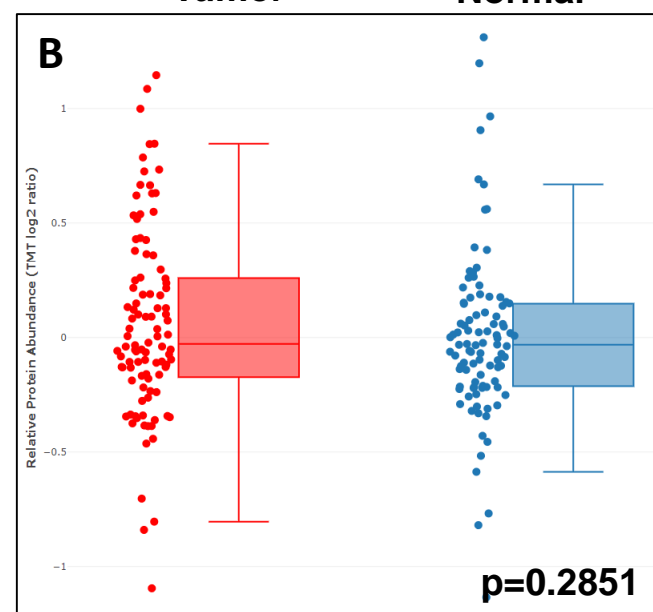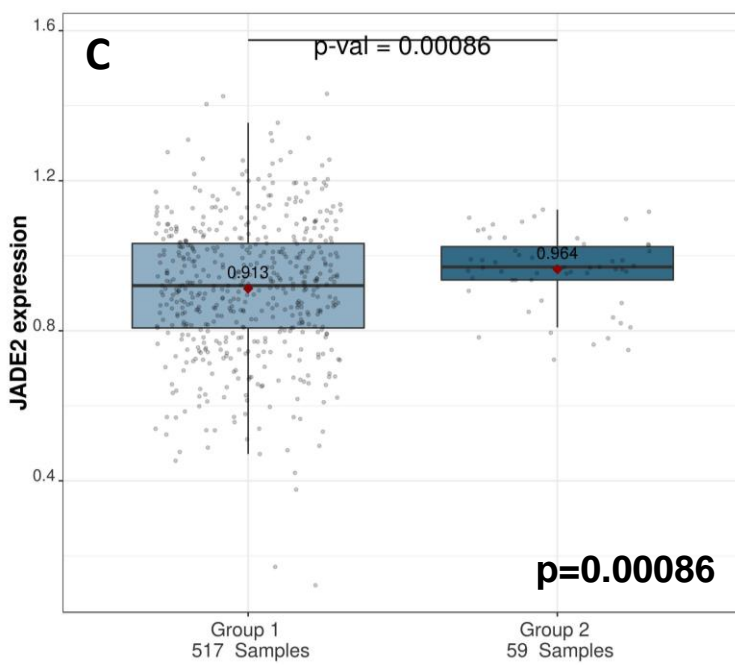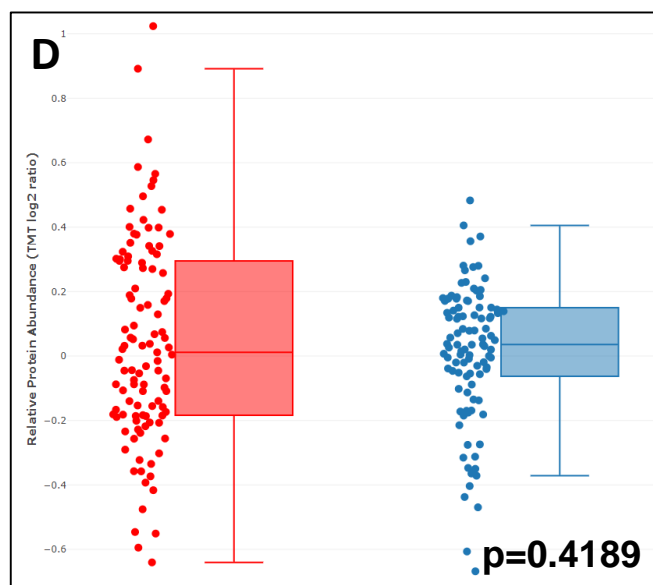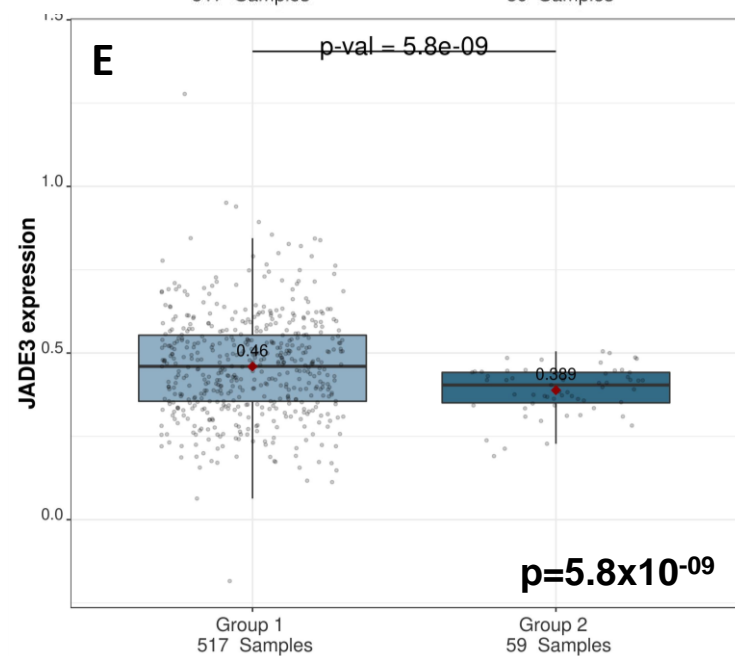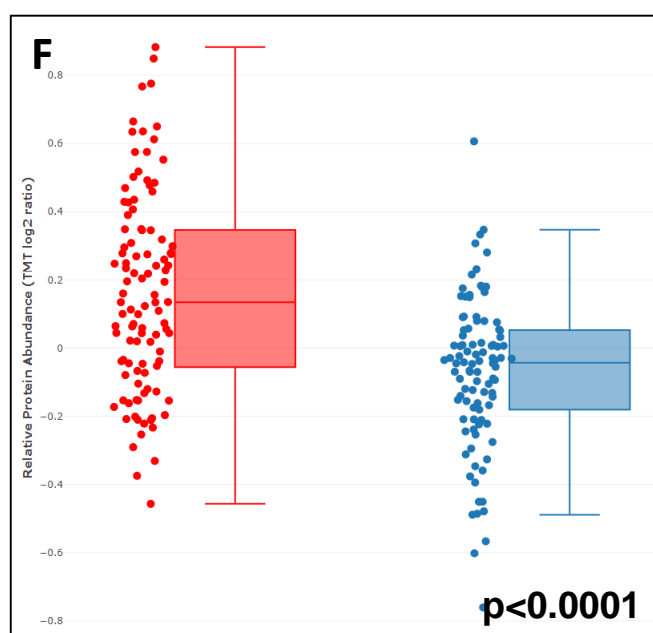

Supplement: s1 [file s1]

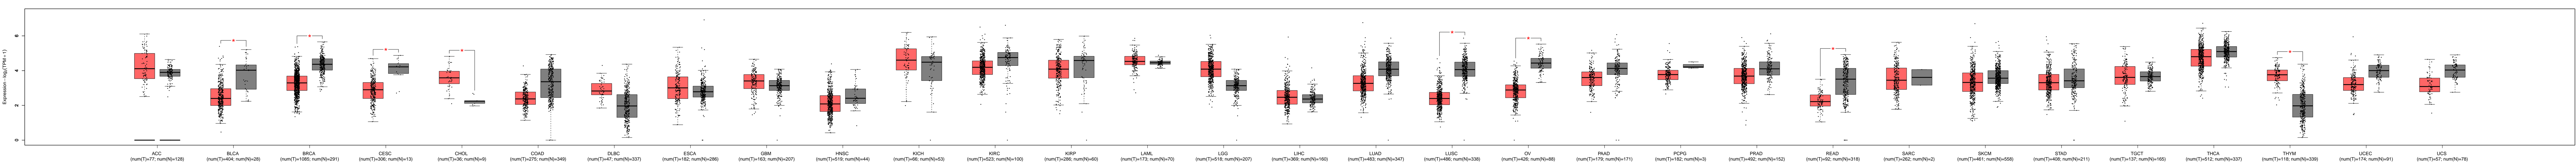

Supplement: s1 [file s1]

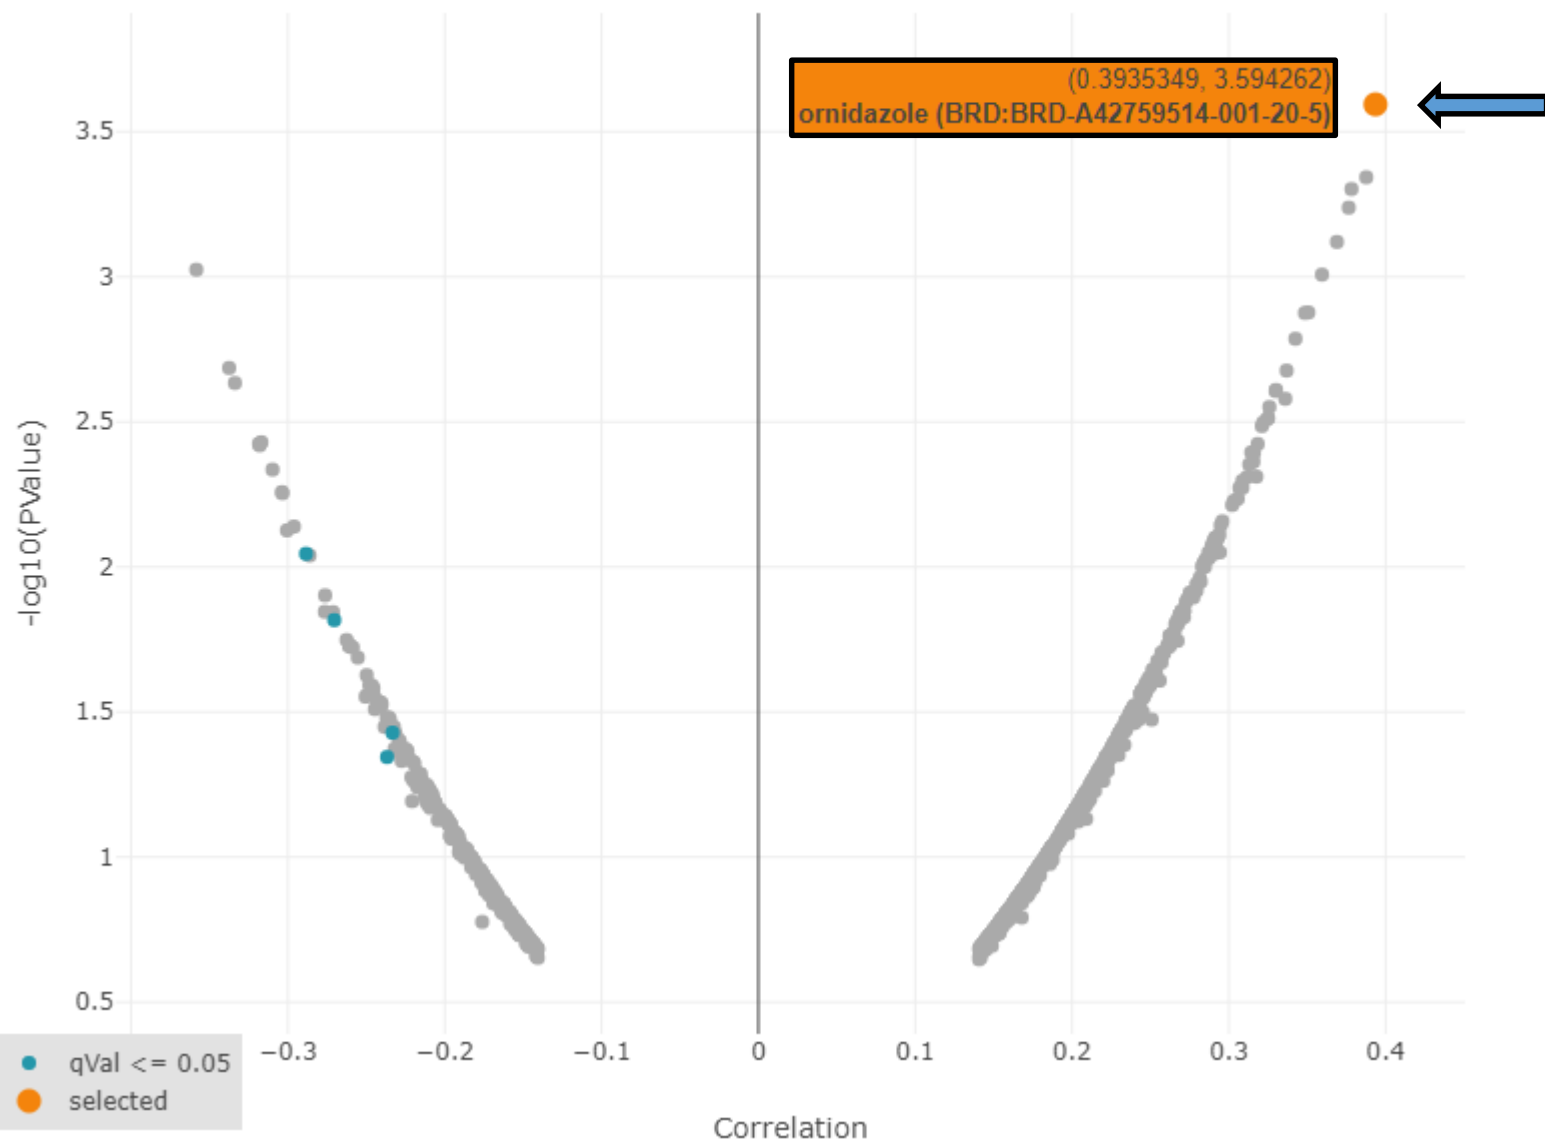

Supplement: s1 [file s1]

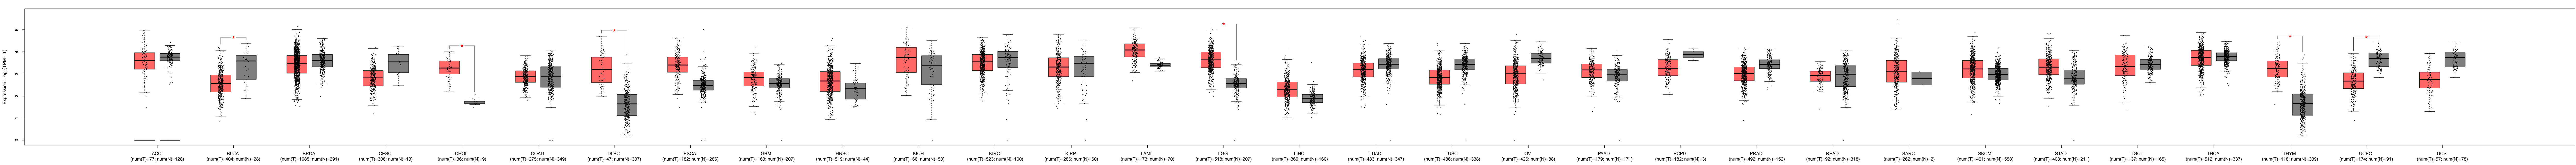

Supplement: s1 [file s1]

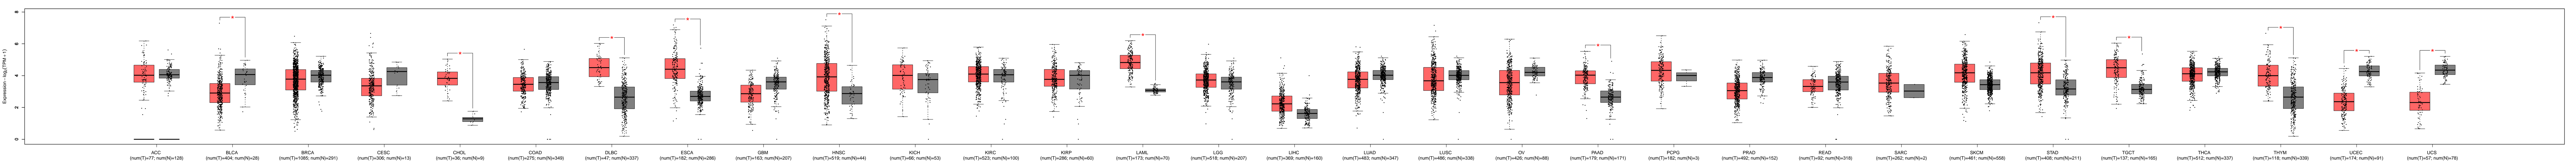

Supplement: s1 [file s1]

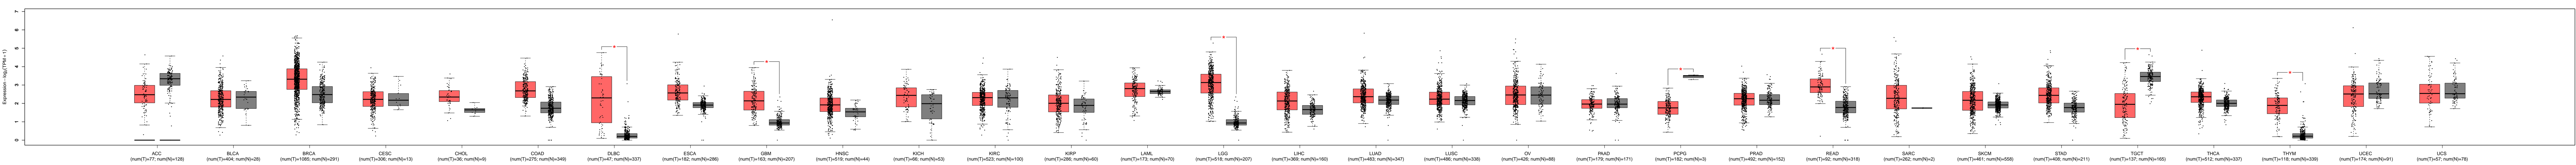

Supplement: s1 [file s1]

**Tumor****Normal**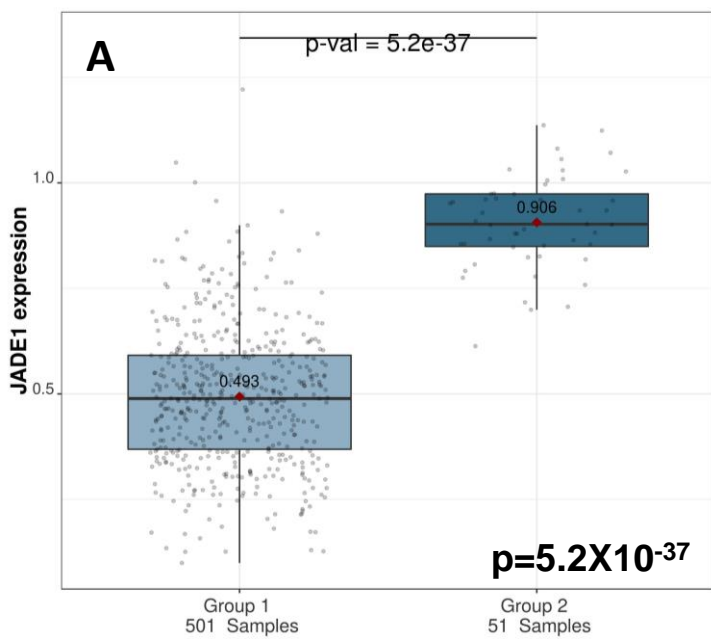**Tumor****Normal**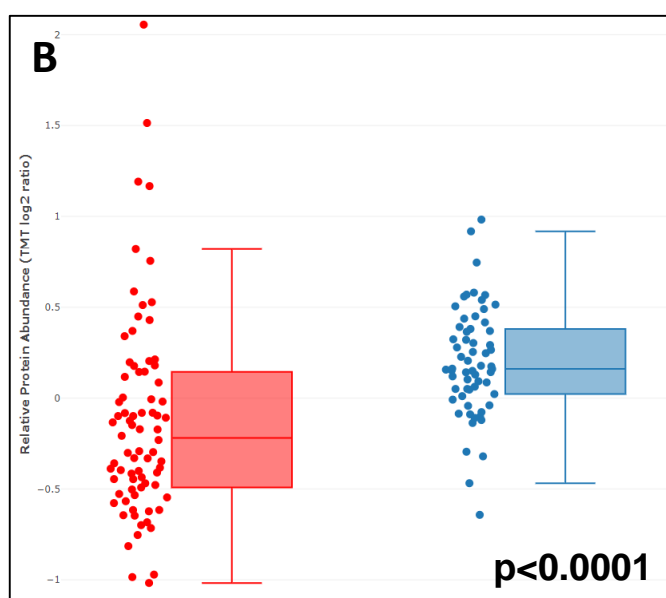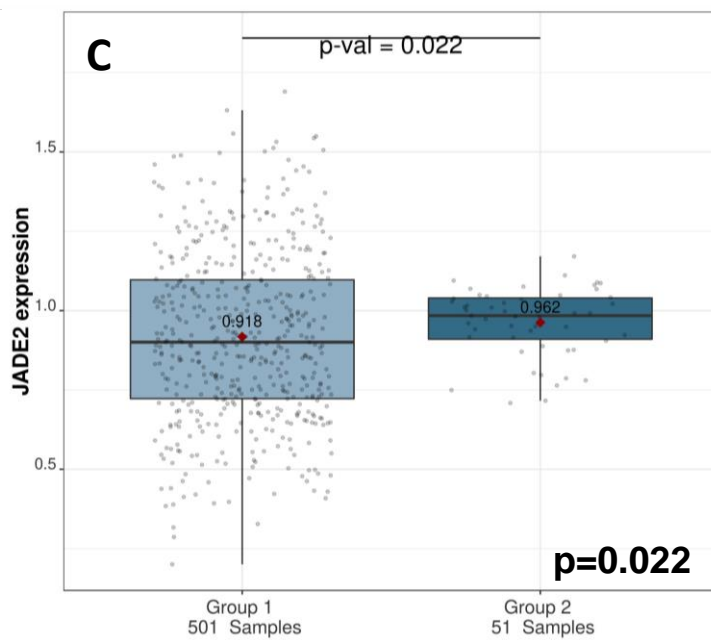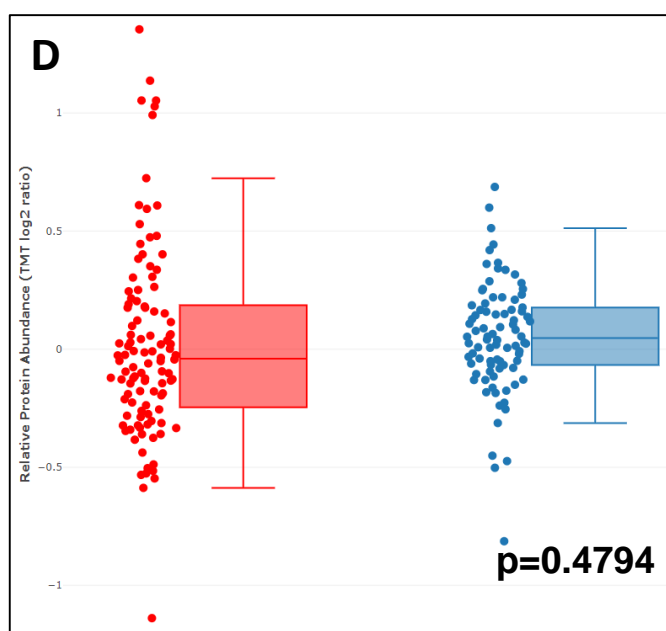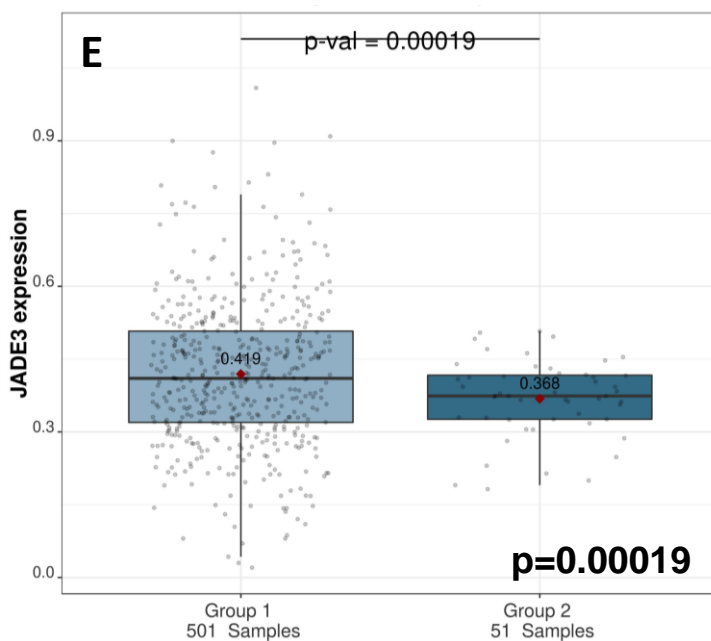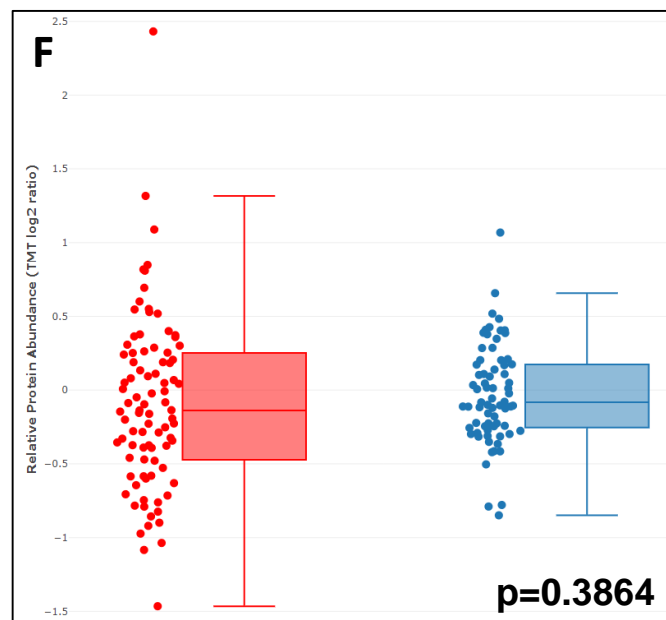

Supplement: s1 [file s1]
